# Supplementary material
Source: Research Square preprint supplement (doi:10.21203/rs.3.rs-10105491/v1)
Supplement: Supplementary file 1 [file 288977307b4798eb43495712.docx]

## Supplementary Table 3

Supplementary Table 3. Proportion of ewes with BHBA ≥ 0.8 mmol/L (subclinical ketosis risk) by feeding group and timepoint

| **Timepoint** | **R60** | **C100** | **p-value (Fisher)** |
| --- | --- | --- | --- |
| Day -14 | 14/40 (35.0%) | 13/40 (32.5%) | 1.000 |
| Day -7 | 34/40 (85.0%) | 20/40 (50.0%) | **0.002** |
| Lambing | 33/40 (82.5%) | 31/40 (77.5%) | 0.781 |
| Day +7 | 32/40 (80.0%) | 16/40 (40.0%) | **<0.001** |
| Values are n/N (%). p-value: Fisher's exact test comparing proportions between feeding groups at each timepoint.  Bold = p < 0.05. Threshold BHBA ≥ 0.8 mmol/L used as indicator of subclinical ketosis/pregnancy toxemia risk. | | | |
