# Supplementary material
Source: Research Square preprint supplement (doi:10.21203/rs.3.rs-10105491/v1)
Supplement: Supplementary file 2 [file 8d21584421969793e4d4f8ad.docx]

## Supplementary Table 2a

Supplementary Table 2a. Pairwise post-hoc comparisons for significant Group × Timepoint interactions, Bonferroni-adjusted

| **Variable** | **Direction** | **Comparison** | **Timepoint** | **Estimate** | **SE** | **p-value** |
| --- | --- | --- | --- | --- | --- | --- |
| BHBA (mmol/L) | Between Groups at each timepoint | R60 - C100 | Day -14 | -0.003 | 0.033 | 0.936 |
| R60 - C100 | Day -7 | 0.121 | 0.033 | **<0.001** |
| R60 - C100 | Lambing | 0.097 | 0.033 | **0.003** |
| R60 - C100 | Day +7 | 0.114 | 0.033 | **<0.001** |
| Across timepoints within group | (Day -14) - (Day -7) | R60 | -0.209 | 0.029 | **<0.001** |
| (Day -14) - Lambing | R60 | -0.214 | 0.029 | **<0.001** |
| (Day -14) - (Day +7) | R60 | -0.130 | 0.029 | **<0.001** |
| (Day -7) - Lambing | R60 | -0.005 | 0.029 | 1.000 |
| (Day -7) - (Day +7) | R60 | 0.079 | 0.029 | **0.036** |
| Lambing - (Day +7) | R60 | 0.084 | 0.029 | **0.022** |
| (Day -14) - (Day -7) | C100 | -0.086 | 0.029 | **0.018** |
| (Day -14) - Lambing | C100 | -0.114 | 0.029 | **<0.001** |
| (Day -14) - (Day +7) | C100 | -0.013 | 0.029 | 1.000 |
| (Day -7) - Lambing | C100 | -0.028 | 0.029 | 1.000 |
| (Day -7) - (Day +7) | C100 | 0.073 | 0.029 | 0.069 |
| Lambing - (Day +7) | C100 | 0.101 | 0.029 | **0.003** |
| NEFA (mmol/L) | Between Groups at each timepoint | R60 - C100 | Day -14 | -0.031 | 0.035 | 0.387 |
| R60 - C100 | Day -7 | 0.210 | 0.035 | **<0.001** |
| R60 - C100 | Lambing | 0.262 | 0.035 | **<0.001** |
| R60 - C100 | Day +7 | 0.273 | 0.035 | **<0.001** |
| Across timepoints within group | (Day -14) - (Day -7) | R60 | -0.360 | 0.031 | **<0.001** |
| (Day -14) - Lambing | R60 | -0.435 | 0.031 | **<0.001** |
| (Day -14) - (Day +7) | R60 | -0.335 | 0.031 | **<0.001** |
| (Day -7) - Lambing | R60 | -0.075 | 0.031 | 0.106 |
| (Day -7) - (Day +7) | R60 | 0.025 | 0.031 | 1.000 |
| Lambing - (Day +7) | R60 | 0.100 | 0.031 | **0.010** |
| (Day -14) - (Day -7) | C100 | -0.120 | 0.031 | **0.001** |
| (Day -14) - Lambing | C100 | -0.142 | 0.031 | **<0.001** |
| (Day -14) - (Day +7) | C100 | -0.032 | 0.031 | 1.000 |
| (Day -7) - Lambing | C100 | -0.023 | 0.031 | 1.000 |
| (Day -7) - (Day +7) | C100 | 0.088 | 0.031 | **0.034** |
| Lambing - (Day +7) | C100 | 0.110 | 0.031 | **0.003** |
| ALT (U/L) | Between Groups at each timepoint | R60 - C100 | Day -14 | -2.150 | 1.679 | 0.201 |
| R60 - C100 | Day -7 | -4.250 | 1.679 | **0.012** |
| R60 - C100 | Lambing | -5.700 | 1.679 | **<0.001** |
| R60 - C100 | Day +7 | -4.400 | 1.679 | **0.009** |
| Across timepoints within group | (Day -14) - (Day -7) | R60 | 1.525 | 1.672 | 1.000 |
| (Day -14) - Lambing | R60 | -2.000 | 1.672 | 1.000 |
| (Day -14) - (Day +7) | R60 | -4.325 | 1.672 | 0.061 |
| (Day -7) - Lambing | R60 | -3.525 | 1.672 | 0.216 |
| (Day -7) - (Day +7) | R60 | -5.850 | 1.672 | **0.003** |
| Lambing - (Day +7) | R60 | -2.325 | 1.672 | 0.993 |
| (Day -14) - (Day -7) | C100 | -0.575 | 1.672 | 1.000 |
| (Day -14) - Lambing | C100 | -5.550 | 1.672 | **0.006** |
| (Day -14) - (Day +7) | C100 | -6.575 | 1.672 | **<0.001** |
| (Day -7) - Lambing | C100 | -4.975 | 1.672 | **0.019** |
| (Day -7) - (Day +7) | C100 | -6.000 | 1.672 | **0.002** |
| Lambing - (Day +7) | C100 | -1.025 | 1.672 | 1.000 |
| Triglycerides (mg/dL) | Between Groups at each timepoint | R60 - C100 | Day -14 | 1.781 | 1.724 | 0.302 |
| R60 - C100 | Day -7 | 1.406 | 1.724 | 0.415 |
| R60 - C100 | Lambing | -2.019 | 1.724 | 0.242 |
| R60 - C100 | Day +7 | -1.669 | 1.724 | 0.334 |
| Across timepoints within group | (Day -14) - (Day -7) | R60 | -1.075 | 1.717 | 1.000 |
| (Day -14) - Lambing | R60 | -3.900 | 1.717 | 0.144 |
| (Day -14) - (Day +7) | R60 | -8.575 | 1.717 | **<0.001** |
| (Day -7) - Lambing | R60 | -2.825 | 1.717 | 0.607 |
| (Day -7) - (Day +7) | R60 | -7.500 | 1.717 | **<0.001** |
| Lambing - (Day +7) | R60 | -4.675 | 1.717 | **0.042** |
| (Day -14) - (Day -7) | C100 | -1.450 | 1.717 | 1.000 |
| (Day -14) - Lambing | C100 | -7.700 | 1.717 | **<0.001** |
| (Day -14) - (Day +7) | C100 | -12.025 | 1.717 | **<0.001** |
| (Day -7) - Lambing | C100 | -6.250 | 1.717 | **0.002** |
| (Day -7) - (Day +7) | C100 | -10.575 | 1.717 | **<0.001** |
| Lambing - (Day +7) | C100 | -4.325 | 1.717 | 0.074 |
| Cholesterol (mg/dL) | Between Groups at each timepoint | R60 - C100 | Day -14 | 0.907 | 2.263 | 0.689 |
| R60 - C100 | Day -7 | 1.757 | 2.263 | 0.438 |
| R60 - C100 | Lambing | 9.432 | 2.263 | **<0.001** |
| R60 - C100 | Day +7 | 4.482 | 2.263 | **0.049** |
| Across timepoints within group | (Day -14) - (Day -7) | R60 | -1.500 | 2.092 | 1.000 |
| (Day -14) - Lambing | R60 | 0.975 | 2.092 | 1.000 |
| (Day -14) - (Day +7) | R60 | 8.625 | 2.092 | **<0.001** |
| (Day -7) - Lambing | R60 | 2.475 | 2.092 | 1.000 |
| (Day -7) - (Day +7) | R60 | 10.125 | 2.092 | **<0.001** |
| Lambing - (Day +7) | R60 | 7.650 | 2.092 | **0.002** |
| (Day -14) - (Day -7) | C100 | -0.650 | 2.092 | 1.000 |
| (Day -14) - Lambing | C100 | 9.500 | 2.092 | **<0.001** |
| (Day -14) - (Day +7) | C100 | 12.200 | 2.092 | **<0.001** |
| (Day -7) - Lambing | C100 | 10.150 | 2.092 | **<0.001** |
| (Day -7) - (Day +7) | C100 | 12.850 | 2.092 | **<0.001** |
| Lambing - (Day +7) | C100 | 2.700 | 2.092 | 1.000 |
| Estimate = difference in marginal means from the linear mixed model. p-values are Bonferroni-adjusted. Bold = p < 0.05. Grey rows show between-group comparisons at each timepoint. White rows show across-timepoint comparisons within each group. | | | | | | |

## Supplementary Table 2b

Supplementary Table 2b. Pairwise post-hoc comparisons for significant LitterType × Timepoint interactions, Bonferroni-adjusted

| **Variable** | **Direction** | **Comparison** | **Timepoint** | **Estimate** | **SE** | **p-value** |
| --- | --- | --- | --- | --- | --- | --- |
| NEFA (mmol/L) | Between LitterTypes at each timepoint | Singleton - (Twin-bearing) | Day -14 | -0.151 | 0.036 | **<0.001** |
| Singleton - (Twin-bearing) | Day -7 | -0.155 | 0.036 | **<0.001** |
| Singleton - (Twin-bearing) | Lambing | -0.070 | 0.036 | 0.053 |
| Singleton - (Twin-bearing) | Day +7 | -0.081 | 0.036 | **0.026** |
| Across timepoints within group | (Day -14) - (Day -7) | Singleton | -0.238 | 0.033 | **<0.001** |
| (Day -14) - Lambing | Singleton | -0.323 | 0.033 | **<0.001** |
| (Day -14) - (Day +7) | Singleton | -0.213 | 0.033 | **<0.001** |
| (Day -7) - Lambing | Singleton | -0.085 | 0.033 | 0.058 |
| (Day -7) - (Day +7) | Singleton | 0.025 | 0.033 | 1.000 |
| Lambing - (Day +7) | Singleton | 0.110 | 0.033 | **0.005** |
| (Day -14) - (Day -7) | Twin-bearing | -0.242 | 0.038 | **<0.001** |
| (Day -14) - Lambing | Twin-bearing | -0.242 | 0.038 | **<0.001** |
| (Day -14) - (Day +7) | Twin-bearing | -0.143 | 0.038 | **0.001** |
| (Day -7) - Lambing | Twin-bearing | 0.000 | 0.038 | 1.000 |
| (Day -7) - (Day +7) | Twin-bearing | 0.099 | 0.038 | 0.057 |
| Lambing - (Day +7) | Twin-bearing | 0.099 | 0.038 | 0.058 |
| ALT (U/L) | Between LitterTypes at each timepoint | Singleton - (Twin-bearing) | Day -14 | 0.539 | 1.687 | 0.750 |
| Singleton - (Twin-bearing) | Day -7 | 1.759 | 1.687 | 0.298 |
| Singleton - (Twin-bearing) | Lambing | -3.331 | 1.687 | **0.049** |
| Singleton - (Twin-bearing) | Day +7 | 2.498 | 1.687 | 0.140 |
| Across timepoints within group | (Day -14) - (Day -7) | Singleton | -0.043 | 1.549 | 1.000 |
| (Day -14) - Lambing | Singleton | -2.130 | 1.549 | 1.000 |
| (Day -14) - (Day +7) | Singleton | -6.283 | 1.549 | **<0.001** |
| (Day -7) - Lambing | Singleton | -2.087 | 1.549 | 1.000 |
| (Day -7) - (Day +7) | Singleton | -6.239 | 1.549 | **<0.001** |
| Lambing - (Day +7) | Singleton | -4.152 | 1.549 | **0.047** |
| (Day -14) - (Day -7) | Twin-bearing | 1.176 | 1.802 | 1.000 |
| (Day -14) - Lambing | Twin-bearing | -6.000 | 1.802 | **0.006** |
| (Day -14) - (Day +7) | Twin-bearing | -4.324 | 1.802 | 0.103 |
| (Day -7) - Lambing | Twin-bearing | -7.176 | 1.802 | **<0.001** |
| (Day -7) - (Day +7) | Twin-bearing | -5.500 | 1.802 | **0.015** |
| Lambing - (Day +7) | Twin-bearing | 1.676 | 1.802 | 1.000 |
| Triglycerides (mg/dL) | Between LitterTypes at each timepoint | Singleton - (Twin-bearing) | Day -14 | 3.165 | 1.731 | 0.068 |
| Singleton - (Twin-bearing) | Day -7 | -2.312 | 1.731 | 0.182 |
| Singleton - (Twin-bearing) | Lambing | -3.219 | 1.731 | 0.064 |
| Singleton - (Twin-bearing) | Day +7 | 1.845 | 1.731 | 0.287 |
| Across timepoints within group | (Day -14) - (Day -7) | Singleton | 1.065 | 1.589 | 1.000 |
| (Day -14) - Lambing | Singleton | -3.087 | 1.589 | 0.319 |
| (Day -14) - (Day +7) | Singleton | -9.739 | 1.589 | **<0.001** |
| (Day -7) - Lambing | Singleton | -4.152 | 1.589 | 0.057 |
| (Day -7) - (Day +7) | Singleton | -10.804 | 1.589 | **<0.001** |
| Lambing - (Day +7) | Singleton | -6.652 | 1.589 | **<0.001** |
| (Day -14) - (Day -7) | Twin-bearing | -4.412 | 1.848 | 0.106 |
| (Day -14) - Lambing | Twin-bearing | -9.471 | 1.848 | **<0.001** |
| (Day -14) - (Day +7) | Twin-bearing | -11.059 | 1.848 | **<0.001** |
| (Day -7) - Lambing | Twin-bearing | -5.059 | 1.848 | **0.040** |
| (Day -7) - (Day +7) | Twin-bearing | -6.647 | 1.848 | **0.002** |
| Lambing - (Day +7) | Twin-bearing | -1.588 | 1.848 | 1.000 |
| Cholesterol (mg/dL) | Between LitterTypes at each timepoint | Singleton - (Twin-bearing) | Day -14 | 7.237 | 2.163 | **<0.001** |
| Singleton - (Twin-bearing) | Day -7 | 2.406 | 2.163 | 0.267 |
| Singleton - (Twin-bearing) | Lambing | 12.502 | 2.163 | **<0.001** |
| Singleton - (Twin-bearing) | Day +7 | 2.479 | 2.163 | 0.253 |
| Across timepoints within group | (Day -14) - (Day -7) | Singleton | 0.978 | 1.929 | 1.000 |
| (Day -14) - Lambing | Singleton | 3.000 | 1.929 | 0.727 |
| (Day -14) - (Day +7) | Singleton | 12.435 | 1.929 | **<0.001** |
| (Day -7) - Lambing | Singleton | 2.022 | 1.929 | 1.000 |
| (Day -7) - (Day +7) | Singleton | 11.457 | 1.929 | **<0.001** |
| Lambing - (Day +7) | Singleton | 9.435 | 1.929 | **<0.001** |
| (Day -14) - (Day -7) | Twin-bearing | -3.853 | 2.244 | 0.523 |
| (Day -14) - Lambing | Twin-bearing | 8.265 | 2.244 | **0.002** |
| (Day -14) - (Day +7) | Twin-bearing | 7.676 | 2.244 | **0.004** |
| (Day -7) - Lambing | Twin-bearing | 12.118 | 2.244 | **<0.001** |
| (Day -7) - (Day +7) | Twin-bearing | 11.529 | 2.244 | **<0.001** |
| Lambing - (Day +7) | Twin-bearing | -0.588 | 2.244 | 1.000 |
| BCS (1-5) | Between LitterTypes at each timepoint | Singleton - (Twin-bearing) | Day -14 | -0.006 | 0.046 | 0.901 |
| Singleton - (Twin-bearing) | Day -7 | 0.062 | 0.046 | 0.181 |
| Singleton - (Twin-bearing) | Lambing | 0.039 | 0.046 | 0.401 |
| Singleton - (Twin-bearing) | Day +7 | -0.045 | 0.046 | 0.328 |
| Across timepoints within group | (Day -14) - (Day -7) | Singleton | 0.087 | 0.040 | 0.179 |
| (Day -14) - Lambing | Singleton | 0.147 | 0.040 | **0.002** |
| (Day -14) - (Day +7) | Singleton | 0.201 | 0.040 | **<0.001** |
| (Day -7) - Lambing | Singleton | 0.060 | 0.040 | 0.805 |
| (Day -7) - (Day +7) | Singleton | 0.114 | 0.040 | **0.027** |
| Lambing - (Day +7) | Singleton | 0.054 | 0.040 | 1.000 |
| (Day -14) - (Day -7) | Twin-bearing | 0.154 | 0.046 | **0.006** |
| (Day -14) - Lambing | Twin-bearing | 0.191 | 0.046 | **<0.001** |
| (Day -14) - (Day +7) | Twin-bearing | 0.162 | 0.046 | **0.003** |
| (Day -7) - Lambing | Twin-bearing | 0.037 | 0.046 | 1.000 |
| (Day -7) - (Day +7) | Twin-bearing | 0.007 | 0.046 | 1.000 |
| Lambing - (Day +7) | Twin-bearing | -0.029 | 0.046 | 1.000 |
| Feed intake (kg/day) | Between LitterTypes at each timepoint | Singleton - (Twin-bearing) | Day -14 | -0.033 | 0.023 | 0.143 |
| Singleton - (Twin-bearing) | Day -7 | 0.040 | 0.023 | 0.080 |
| Singleton - (Twin-bearing) | Lambing | -0.068 | 0.023 | **0.003** |
| Singleton - (Twin-bearing) | Day +7 | 0.031 | 0.023 | 0.174 |
| Across timepoints within group | (Day -14) - (Day -7) | Singleton | -0.035 | 0.020 | 0.480 |
| (Day -14) - Lambing | Singleton | -0.010 | 0.020 | 1.000 |
| (Day -14) - (Day +7) | Singleton | -0.068 | 0.020 | **0.005** |
| (Day -7) - Lambing | Singleton | 0.025 | 0.020 | 1.000 |
| (Day -7) - (Day +7) | Singleton | -0.033 | 0.020 | 0.603 |
| Lambing - (Day +7) | Singleton | -0.058 | 0.020 | **0.022** |
| (Day -14) - (Day -7) | Twin-bearing | 0.038 | 0.023 | 0.600 |
| (Day -14) - Lambing | Twin-bearing | -0.044 | 0.023 | 0.358 |
| (Day -14) - (Day +7) | Twin-bearing | -0.004 | 0.023 | 1.000 |
| (Day -7) - Lambing | Twin-bearing | -0.082 | 0.023 | **0.003** |
| (Day -7) - (Day +7) | Twin-bearing | -0.042 | 0.023 | 0.435 |
| Lambing - (Day +7) | Twin-bearing | 0.040 | 0.023 | 0.498 |
| Estimate = difference in marginal means from the linear mixed model. p-values are Bonferroni-adjusted. Bold = p < 0.05. Grey rows show between-group comparisons at each timepoint. White rows show across-timepoint comparisons within each group. | | | | | | |
