# Supplementary material
Source: Research Square preprint supplement (doi:10.21203/rs.3.rs-10105491/v1)
Supplement: Supplementary file 3 [file a286a6469bd0ea68afef86b7.docx]

## Supplementary Table 1a

Supplementary Table 1a. Blood metabolites and production traits by feeding group and timepoint (Mean ± SE)

| **Variable** | **R60** | | | | **C100** | | | |
| --- | --- | --- | --- | --- | --- | --- | --- | --- |
| **Variable** | **Day -14** | **Day -7** | **Lambing** | **Day +7** | **Day -14** | **Day -7** | **Lambing** | **Day +7** |
| *BHBA (mmol/L)* | 0.75 ± 0.03 | 0.96 ± 0.03 | 0.97 ± 0.03 | 0.88 ± 0.02 | 0.75 ± 0.01 | 0.84 ± 0.02 | 0.87 ± 0.01 | 0.77 ± 0.03 |
| *NEFA (mmol/L)* | 0.55 ± 0.02 | 0.91 ± 0.04 | 0.98 ± 0.04 | 0.88 ± 0.02 | 0.58 ± 0.02 | 0.70 ± 0.02 | 0.72 ± 0.02 | 0.61 ± 0.01 |
| *Glucose (mg/dL)* | 59.99 ± 0.70 | 55.01 ± 1.99 | 53.24 ± 1.22 | 54.29 ± 1.62 | 60.27 ± 0.81 | 57.11 ± 1.00 | 55.51 ± 1.30 | 54.80 ± 0.62 |
| *Total protein (g/dL)* | 7.28 ± 0.08 | 7.35 ± 0.06 | 7.24 ± 0.07 | 6.94 ± 0.10 | 7.30 ± 0.07 | 7.17 ± 0.05 | 7.21 ± 0.07 | 7.03 ± 0.06 |
| *Albumin (g/dL)* | 3.20 ± 0.06 | 3.21 ± 0.05 | 3.10 ± 0.10 | 3.04 ± 0.05 | 3.31 ± 0.07 | 3.36 ± 0.07 | 3.31 ± 0.07 | 3.06 ± 0.05 |
| *BUN (mg/dL)* | 22.05 ± 0.69 | 20.75 ± 0.56 | 22.32 ± 0.56 | 28.12 ± 0.83 | 21.65 ± 0.68 | 23.20 ± 0.67 | 27.35 ± 1.40 | 27.98 ± 0.90 |
| *Calcium (mg/dL)* | 10.75 ± 0.12 | 10.78 ± 0.10 | 10.55 ± 0.16 | 9.68 ± 0.16 | 10.88 ± 0.10 | 10.82 ± 0.11 | 10.80 ± 0.11 | 10.00 ± 0.16 |
| *Phosphorus (mg/dL)* | 6.38 ± 0.12 | 6.28 ± 0.17 | 6.08 ± 0.09 | 5.55 ± 0.15 | 6.30 ± 0.14 | 6.33 ± 0.12 | 5.95 ± 0.18 | 5.33 ± 0.16 |
| *AST (U/L)* | 89.88 ± 2.09 | 89.47 ± 1.64 | 91.05 ± 1.89 | 105.17 ± 2.15 | 91.28 ± 1.95 | 90.35 ± 1.10 | 91.47 ± 2.33 | 100.58 ± 1.69 |
| *ALT (U/L)* | 24.85 ± 0.67 | 23.32 ± 1.12 | 26.85 ± 0.97 | 29.18 ± 1.74 | 26.80 ± 0.77 | 27.38 ± 1.07 | 32.35 ± 1.33 | 33.38 ± 1.43 |
| *GGT (U/L)* | 37.85 ± 1.25 | 37.27 ± 1.02 | 36.45 ± 0.92 | 44.62 ± 1.99 | 35.95 ± 0.78 | 36.90 ± 1.22 | 39.73 ± 1.80 | 46.33 ± 1.64 |
| *Triglycerides (mg/dL)* | 21.48 ± 0.93 | 22.55 ± 0.78 | 25.38 ± 0.79 | 30.05 ± 1.52 | 19.68 ± 0.86 | 21.12 ± 1.21 | 27.38 ± 1.13 | 31.70 ± 2.00 |
| *Cholesterol (mg/dL)* | 71.12 ± 1.20 | 72.62 ± 1.33 | 70.15 ± 1.35 | 62.50 ± 1.50 | 70.50 ± 1.28 | 71.15 ± 1.27 | 61.00 ± 2.30 | 58.30 ± 2.19 |
| *Body weight (kg)* | 54.02 ± 0.95 | 53.32 ± 0.97 | 49.98 ± 0.92 | 49.70 ± 0.88 | 54.68 ± 0.78 | 54.50 ± 0.79 | 50.26 ± 0.84 | 50.48 ± 0.83 |
| *BCS (1-5)* | 2.98 ± 0.02 | 2.84 ± 0.03 | 2.79 ± 0.03 | 2.72 ± 0.03 | 2.97 ± 0.05 | 2.87 ± 0.03 | 2.83 ± 0.03 | 2.86 ± 0.03 |
| *Feed intake (kg/day)* | 0.75 ± 0.01 | 0.78 ± 0.01 | 0.77 ± 0.02 | 0.77 ± 0.02 | 1.22 ± 0.03 | 1.21 ± 0.02 | 1.26 ± 0.01 | 1.28 ± 0.01 |
| Values are Mean ± SE. Timepoints: Day -14 (2 wk pre-lambing), Day -7 (1 wk pre-lambing), Lambing, Day +7 (1 wk post-lambing). | | | | | | | | |

## Supplementary Table 1b

Supplementary Table 1b. Blood metabolites and production traits by litter type and timepoint (Mean ± SE)

| **Variable** | **Singleton** | | | | **Twin-bearing** | | | |
| --- | --- | --- | --- | --- | --- | --- | --- | --- |
| **Variable** | **Day -14** | **Day -7** | **Lambing** | **Day +7** | **Day -14** | **Day -7** | **Lambing** | **Day +7** |
| *BHBA (mmol/L)* | 0.71 ± 0.02 | 0.86 ± 0.02 | 0.89 ± 0.02 | 0.79 ± 0.02 | 0.82 ± 0.02 | 0.96 ± 0.03 | 0.95 ± 0.03 | 0.87 ± 0.03 |
| *NEFA (mmol/L)* | 0.50 ± 0.02 | 0.74 ± 0.03 | 0.82 ± 0.04 | 0.72 ± 0.02 | 0.64 ± 0.02 | 0.89 ± 0.04 | 0.89 ± 0.03 | 0.79 ± 0.03 |
| *Glucose (mg/dL)* | 61.23 ± 0.55 | 55.01 ± 1.37 | 56.14 ± 0.88 | 56.78 ± 1.28 | 58.65 ± 0.95 | 57.47 ± 1.84 | 51.99 ± 1.67 | 51.51 ± 0.81 |
| *Total protein (g/dL)* | 7.26 ± 0.07 | 7.26 ± 0.05 | 7.27 ± 0.07 | 6.96 ± 0.07 | 7.34 ± 0.08 | 7.27 ± 0.07 | 7.16 ± 0.08 | 7.01 ± 0.09 |
| *Albumin (g/dL)* | 3.18 ± 0.05 | 3.23 ± 0.06 | 3.32 ± 0.07 | 3.09 ± 0.03 | 3.35 ± 0.08 | 3.36 ± 0.08 | 3.05 ± 0.10 | 2.99 ± 0.07 |
| *BUN (mg/dL)* | 21.48 ± 0.71 | 21.59 ± 0.60 | 22.93 ± 0.53 | 27.78 ± 0.80 | 22.35 ± 0.62 | 22.50 ± 0.70 | 27.41 ± 1.65 | 28.41 ± 0.95 |
| *Calcium (mg/dL)* | 10.72 ± 0.10 | 10.85 ± 0.10 | 10.83 ± 0.12 | 9.89 ± 0.14 | 10.94 ± 0.13 | 10.74 ± 0.11 | 10.47 ± 0.16 | 9.76 ± 0.18 |
| *Phosphorus (mg/dL)* | 6.15 ± 0.12 | 6.24 ± 0.15 | 6.04 ± 0.14 | 5.37 ± 0.15 | 6.59 ± 0.14 | 6.38 ± 0.13 | 5.97 ± 0.15 | 5.53 ± 0.15 |
| *AST (U/L)* | 90.13 ± 2.15 | 89.17 ± 1.14 | 89.89 ± 2.13 | 102.70 ± 1.91 | 91.18 ± 1.69 | 90.91 ± 1.74 | 93.12 ± 1.99 | 103.12 ± 2.01 |
| *ALT (U/L)* | 25.96 ± 0.70 | 26.00 ± 1.06 | 28.09 ± 0.96 | 32.24 ± 1.52 | 25.65 ± 0.79 | 24.47 ± 1.23 | 31.65 ± 1.55 | 29.97 ± 1.74 |
| *GGT (U/L)* | 36.43 ± 1.01 | 37.33 ± 1.07 | 35.67 ± 0.86 | 46.50 ± 1.86 | 37.53 ± 1.09 | 36.76 ± 1.19 | 41.35 ± 2.00 | 44.09 ± 1.67 |
| *Triglycerides (mg/dL)* | 21.96 ± 0.88 | 20.89 ± 1.01 | 25.04 ± 0.82 | 31.70 ± 1.79 | 18.71 ± 0.82 | 23.12 ± 0.97 | 28.18 ± 1.14 | 29.76 ± 1.69 |
| *Cholesterol (mg/dL)* | 73.83 ± 1.01 | 72.85 ± 1.32 | 70.83 ± 1.36 | 61.39 ± 1.87 | 66.74 ± 1.24 | 70.59 ± 1.20 | 58.47 ± 2.30 | 59.06 ± 1.89 |
| *Body weight (kg)* | 54.70 ± 0.81 | 54.18 ± 0.83 | 51.37 ± 0.82 | 51.15 ± 0.80 | 53.88 ± 0.93 | 53.54 ± 0.96 | 48.44 ± 0.89 | 48.66 ± 0.87 |
| *BCS (1-5)* | 2.97 ± 0.04 | 2.88 ± 0.03 | 2.82 ± 0.03 | 2.77 ± 0.02 | 2.98 ± 0.04 | 2.82 ± 0.03 | 2.79 ± 0.03 | 2.82 ± 0.04 |
| *Feed intake (kg/day)* | 0.96 ± 0.04 | 1.00 ± 0.04 | 0.97 ± 0.04 | 1.03 ± 0.04 | 1.02 ± 0.05 | 0.98 ± 0.04 | 1.06 ± 0.04 | 1.02 ± 0.05 |

Values are Mean ± SE. Timepoints: Day -14 (2 wk pre-lambing), Day -7 (1 wk pre-lambing), Lambing, Day +7 (1 wk post-lambing).
